# Supplementary material
Source: PubMed Central journal article supplement (PMC5102340)
Supplement: NIHMS797746-supplement-supporting_data.pdf [file NIHMS797746-supplement-supporting_data.pdf]

# ADVANCED FUNCTIONAL MATERIALS

## Supporting Information

for *Adv. Funct. Mater.*, DOI: 10.1002/adfm.201600210

An Underwater Surface-Drying Peptide Inspired by a Mussel  
Adhesive Protein

*Wei Wei, Luigi Petrone, YerPeng Tan, Hao Cai, Jacob N.  
Israelachvili, Ali Miserez, and J. Herbert Waite\**

## **Supporting Information**

### **An Underwater Surface Drying Peptide Inspired by a Mussel**

#### **Adhesive Protein**

Wei Wei<sup>1,‡</sup>, Luigi Petrone<sup>2,‡</sup>, Yerpeng Tan<sup>4</sup>, Hao Cai<sup>2</sup>, Jacob N. Israelachvili<sup>1,4</sup>, Ali Miserez<sup>2,3</sup>,  
J. Herbert Waite<sup>1,4\*</sup>

<sup>1</sup> Materials Research Lab, University of California, Santa Barbara

<sup>2</sup> School of Materials Science and Engineering, Nanyang Technological University, Singapore

<sup>3</sup> School of Biological Sciences, Nanyang Technological University, Singapore

<sup>4</sup> Biomolecular Science and Engineering Program, University of California, Santa Barbara

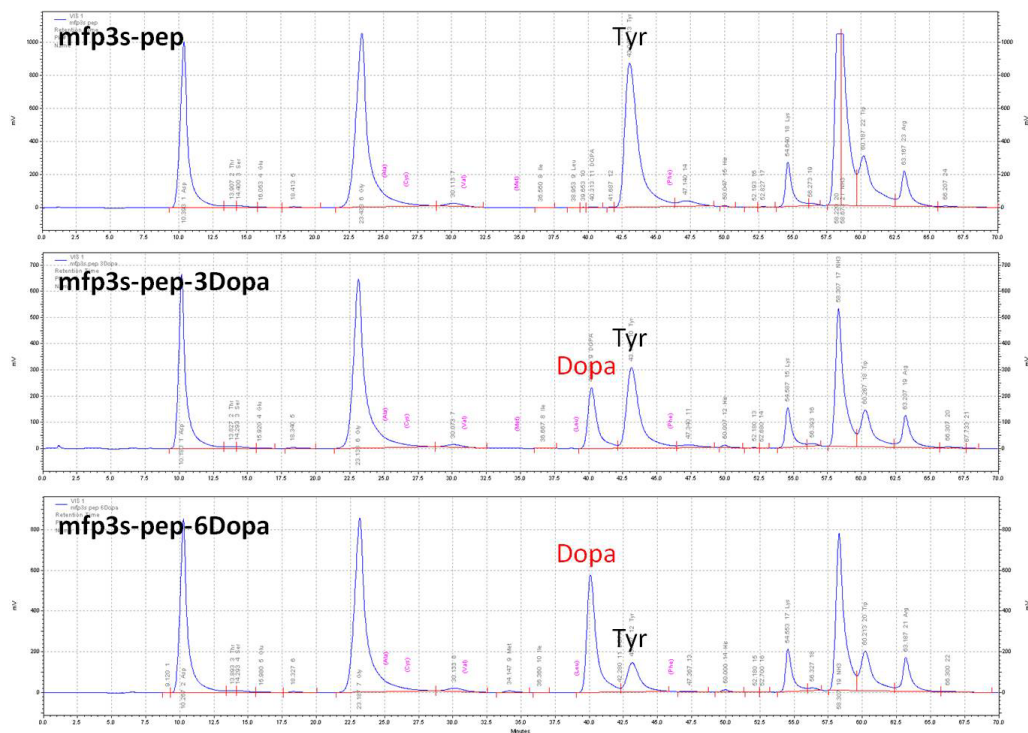

**Figure S1.** Amino acid analyses of mfp3S-pep, mfp3S-pep-3Dopa and mfp3S-pep-6Dopa.

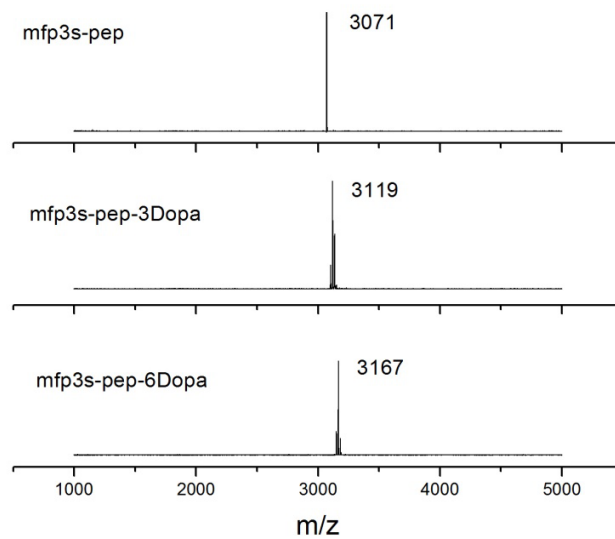

**Figure S2.** MALDI-TOF-MS spectra of mfp3S-pep, mfp3S-pep-3Dopa, and mfp3S-pep-6Dopa after enzymatic hydroxylation by tyrosinase.

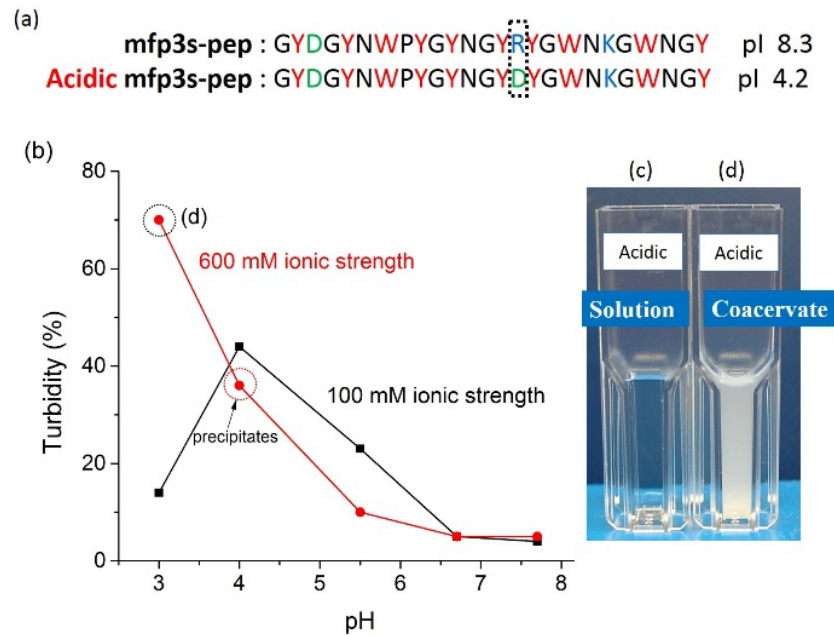

**Figure S3.** (a) Acidic (R→D) version of mfp3S-pep sequence; (b) acidic-mfp3S-pep turbidity under different pH and ionic strength conditions; (c, d) comparison of acidic-mfp3S-pep solution and coacervate.

**mfp3s-pep:** GYDGYNWPYGYNGYRYGWNKGWNGY

**Mfp3s-pep-random #1:** NGPGGGYYYGWYKRYYYGWNNWNGD  
 maximum solubility in 10 mM acetic acid: 0.2 mg/ml

**Mfp3s-pep-random #2:** GNGYGYNNYRYWGNKWYPYGGDGYW

**Mfp3s-pep-random #3:** PGNWN RNGYYNWGDYGWYKGYGY  
 maximum solubility in 10 mM acetic acid < 1 mg/ml

**Figure S4.** Mfp3S-pep with 3 randomized sequences and relative solubility in 10 mM acetic acid. Mfp3S-pep-random #2 is boxed to indicate that it was the only randomized sequence able to self-coacervate as mfp3S-pep. (The original sequence mfp3S-pep and mfp3S-pep-random #2 both have solubility higher than 2 mg/ml.)

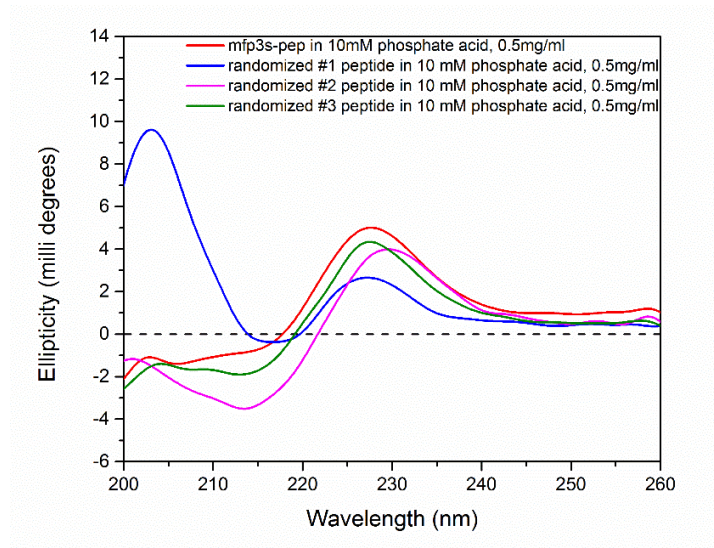

**Figure S5.** CD spectra of Mfp3s-pep and Mfp3s-pep-random #1, 2, 3 in 10 mM phosphoric acid solution.

|                   |                                                        |                   |                                                        |
|-------------------|--------------------------------------------------------|-------------------|--------------------------------------------------------|
| <b>Sequence</b>   | Mfp3s-pep<br>GYDGYNWPYGYNGYRYGWNKGWNGY                 | <b>Sequence</b>   | random #2<br>GNGYGYNNYRYWGNKWYPYGGDGYW                 |
| <b>Prediction</b> | CCCCCCCCCCCCSSSSCCCCCCCC                               | <b>Prediction</b> | CCCCCCCCSSSSCCCCCCCCCCCC                               |
| <b>Conf.Score</b> | 9766437753465340233566679<br>H:Helix; S:Strand; C:Coil | <b>Conf.Score</b> | 9854514404104400036877669<br>H:Helix; S:Strand; C:Coil |
| <b>Sequence</b>   | random #1<br>NGPGGGYGYGWYKRYYGWNNWNGD                  | <b>Sequence</b>   | random #3<br>PGNWNRRNGYYNWGDYGWYKGYGY                  |
| <b>Prediction</b> | CCCCSSSSSSSSSSSSCCCCCCCC                               | <b>Prediction</b> | CCCCCCCCCCCCCCCCCCCCCCCC                               |
| <b>Conf.Score</b> | 9887623666678778312355789<br>H:Helix; S:Strand; C:Coil | <b>Conf.Score</b> | 9854546511144434141442359<br>H:Helix; S:Strand; C:Coil |

**Figure S6.** Predicted secondary structures of mfp3s-pep and mfp3s-pep-random #1, 2, 3 using I-Tasser model.

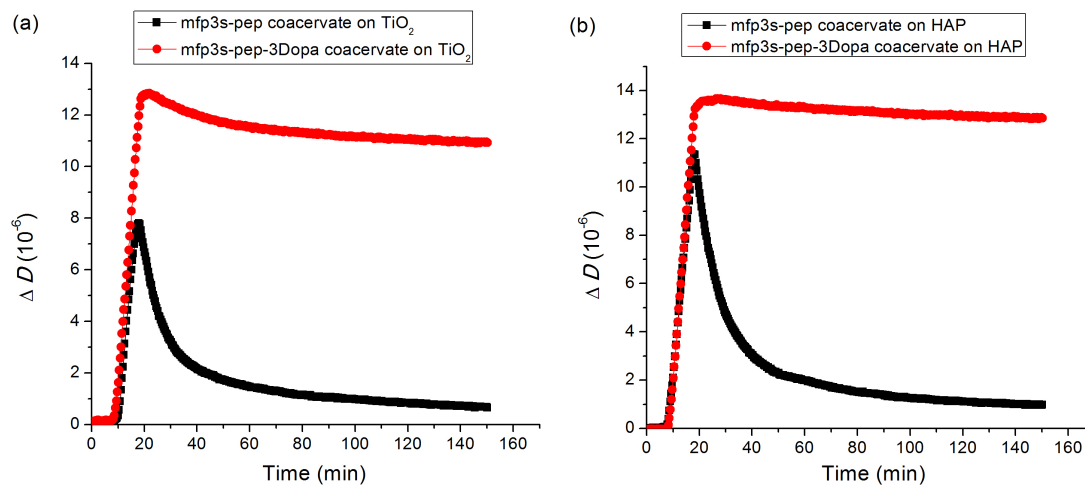

**Figure S7.** Mfp3S-pep, mfp3S-pep-3Dopa coacervates adsorption behavior on HAP and  $\text{TiO}_2$  surface in QCM-D experiments: dissipation change after exposing (a)  $\text{TiO}_2$  and (b) HAP to peptides.

#### **ATR-IR spectroscopic study of dopamine in solution and adsorbed on $\text{TiO}_2$ and HAP.**

Dopamine was selected as a model compound bearing a catechol group for ATR-IR adsorption studies on  $\text{TiO}_2$  and HAP nanoparticle films. The information about the characteristic absorptions of the catechol moiety both in solution and as an adsorbate on the two investigated surfaces assisted in the band assignments of the more complex Dopa-containing peptide and coacervate in this work.

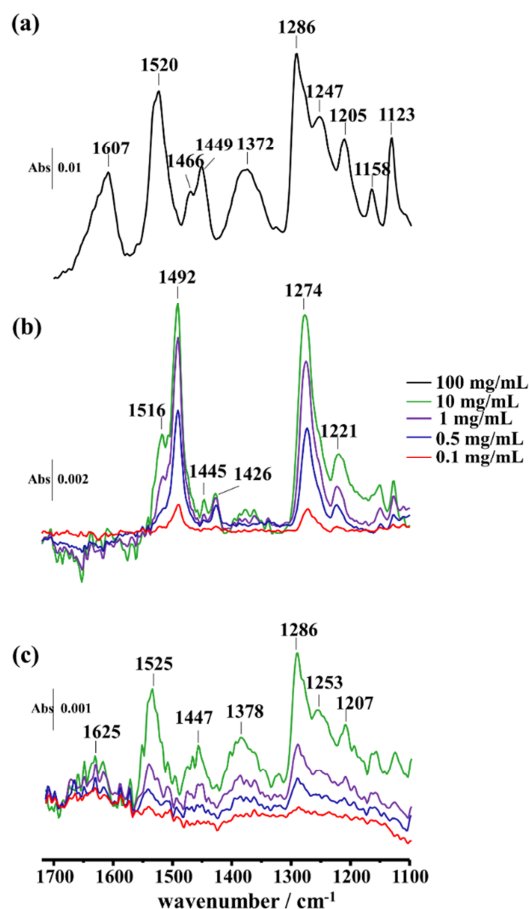

**Figure S8.** ATR-IR spectra of dopamine in 100 mM acetic acid aqueous solution on (a) bare ZnSe prism at 100 mg/mL (black trace); (b) adsorbed on TiO<sub>2</sub> and (c) HAP at 10 (green trace), 1 (indigo trace), 0.5 (blue trace) and 0.1 mg/mL (red trace). Background in a, b, c are from 100 mM acetic acid on ZnSe prism, on TiO<sub>2</sub>- and on HAP-coated ZnSe prism, respectively.

The ATR-IR spectrum of 100 mg/mL dopamine in 100 mM acetic acid solution on the bare ZnSe prism is presented in Figure S7a. More dilute dopamine solutions were also tested but the absorbances were weak and not discernible, whereas spectra of adsorbed dopamine at 100 mg/mL resulted in well-resolved and intense absorptions. The band peaking at 1607 cm<sup>-1</sup> originated from the bending mode ( $\delta$ ) of OH groups of water molecules hydrating the adsorbed dopamine. The absorption at 1520 cm<sup>-1</sup> was attributed to a combination mode of  $\nu(\text{CC})+\delta(\text{CH})$  of free catechol species in solution ( $\text{catechol}_{\text{aq}}$ )<sup>37,53</sup>. Bands observed between 1400 and 1480 cm<sup>-1</sup> were from vibrations of the CH<sub>2</sub> groups<sup>54</sup>, and peaks at 1372 and 1205 cm<sup>-1</sup> were assigned to  $\delta(\text{OH})$  vibrational modes of catechol groups<sup>53,55</sup>. Other catechol absorptions at 1286 and 1247

$\text{cm}^{-1}$  originated from the  $\nu(\text{CO})$  mode, whereas bands at 1158 and 1123  $\text{cm}^{-1}$  were assigned to  $\delta(\text{CH})$  and  $\delta(\text{CH})+\delta(\text{OH})$  modes<sup>37,53,56,57</sup>, respectively. The  $\nu(\text{NH})$  mode of the primary amine in dopamine was observed at higher wavenumbers peaking at  $\sim 3300 \text{ cm}^{-1}$  (not shown). Subsequently, the ZnSe prism was coated with either  $\text{TiO}_2$  or HAP nanoparticle films in order to investigate the adsorption mechanism of dopamine on these surfaces. A 100 mM aqueous acetic acid solution was initially flowed over the particle-coated prism, and a background was recorded. Thereafter, dopamine solutions of 0.1, 0.5, 1 and 10 mg/mL were passed over the investigated nanoparticle films and the ATR-IR spectra were recorded (Figures S7b and S7c). The spectral absorbances increased with the dopamine concentrations and were already detectable on  $\text{TiO}_2$  at the lowest concentration of 0.1 mg/mL. Weaker yet discernible absorbances were recorded on HAP at 0.5 mg/mL dopamine concentration. The characteristic doublet indicative of catechol-Ti(IV) bidentate binuclear coordinative bond was found at 1492 and 1274  $\text{cm}^{-1}$ <sup>37,38</sup>. The ATR-IR spectrum of dopamine adsorbed on HAP showed similarities in terms of bands number and position to the catechol<sub>aq</sub> spectrum recorded at a concentration 100 mg/mL without any nano particulate layer. The major absorbance peaking at 1286  $\text{cm}^{-1}$  and its shoulder at  $\sim 1250 \text{ cm}^{-1}$  (1247  $\text{cm}^{-1}$  in Figure S3a and 1253  $\text{cm}^{-1}$  in Figure S3c) were thus assigned to the  $\nu(\text{CO})$  mode associated with catechol<sub>aq</sub>. The absorption in Figure S3c peaking at 1525  $\text{cm}^{-1}$  was associated with the  $\nu(\text{CC})+\delta(\text{CH})$  mode, as previously observed for the catechol<sub>aq</sub> spectrum (absorption at 1520  $\text{cm}^{-1}$ ). This absorption was discernible in the ATR-IR spectra of dopamine adsorbed on  $\text{TiO}_2$  as a shoulder of the peak at 1492  $\text{cm}^{-1}$  from a concentration of 0.5 mg/mL, which then became more prominent at higher concentrations as a distinct peak at 1516  $\text{cm}^{-1}$ . To summarise, dopamine formed a coordinative bond via the *o*-hydroxyl groups with the Ti(IV) atoms of the  $\text{TiO}_2$  anatase surface, which was apparent as a doublet at 1492 and 1274  $\text{cm}^{-1}$ .



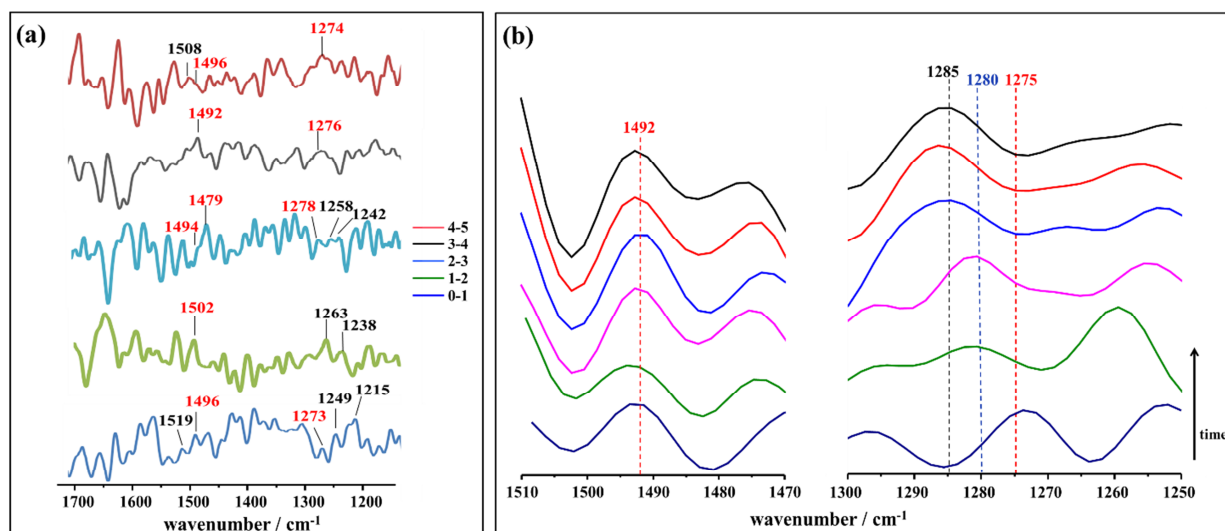

**Figure S9.** (a) ATR-IR difference spectra for mfps-pep-3Dopa coacervate adsorbed on  $\text{TiO}_2$  obtained by subtracting consecutive normalized ATR-IR spectra in Figure 5c. (b) Evolution of the negative second-derivative spectra of mfps-pep-3Dopa adsorbed on  $\text{TiO}_2$  in the  $1505\text{--}1475\text{ cm}^{-1}$  and  $1300\text{--}1255\text{ cm}^{-1}$  spectral regions. Peaks characteristic of catechol-Ti(IV) coordinative bond, an intermediate surface structure, and outer-sphere complex are indicated by the red, blue and black dotted lines, respectively.

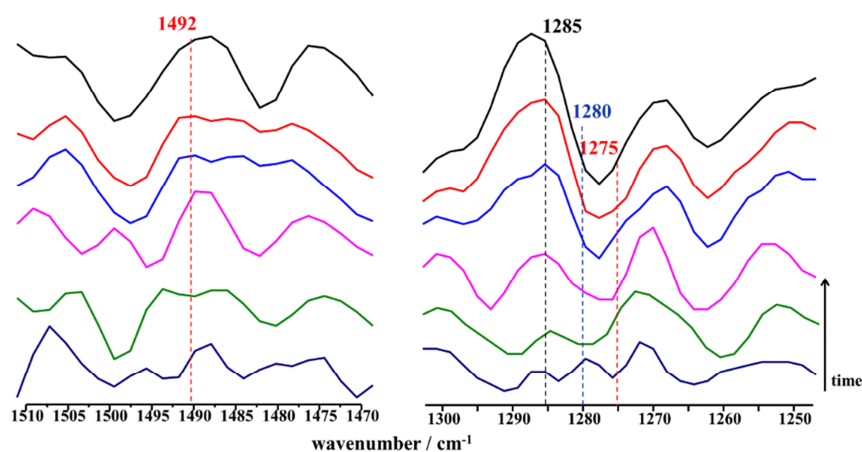

**Figure S10.** Evolution of the negative second-derivative spectra of mfps-pep-3Dopa adsorbed on HAP in the  $1505\text{--}1475\text{ cm}^{-1}$  and  $1300\text{--}1255\text{ cm}^{-1}$  spectral regions. Peaks characteristic of catechol coordinative bond, an intermediate surface structure, and outer-sphere complex are indicated by the red, blue and black dotted lines, respectively.

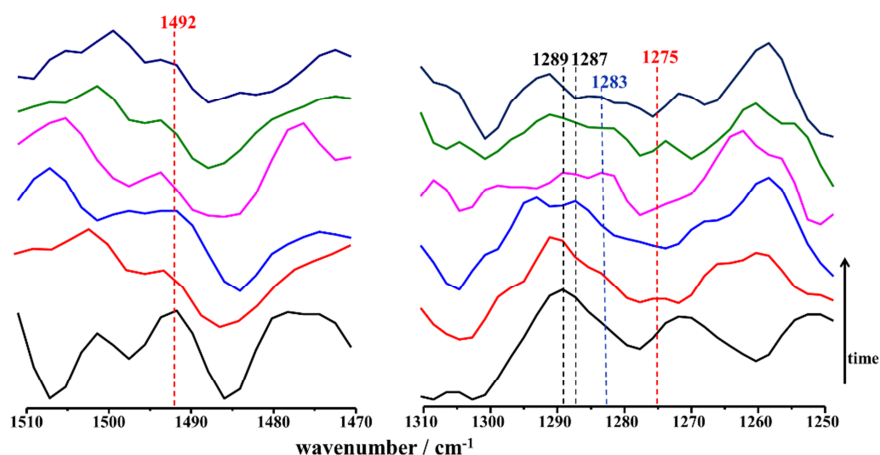

**Figure S11.** Evolution of the negative second-derivative spectra of mfps-pep-3Dopa coacervate adsorbed on HAP in the 1505-1475  $\text{cm}^{-1}$  and 1300-1255  $\text{cm}^{-1}$  spectral regions. Peaks characteristic of catechol coordinative bond, an intermediate surface structure, and outer-sphere complex are indicated by the red, blue and black dotted lines, respectively.

### Peptides' Conformational transition during adsorption by ATR-FTIR

The amide I band in the ATR-IR spectra of adsorbed mfp3S-pep on  $\text{TiO}_2$  (Fig. 7a) showed a peak at 1660  $\text{cm}^{-1}$  in all recorded spectra. This peak is indicative of the concomitant presence of  $\alpha$ -helix and  $\beta$ -turn structures peaking at about 1656 and 1667  $\text{cm}^{-1}$ , respectively. Structural changes are inevitable whenever peptides interact either specifically or nonspecifically with a substrate due to the formation of new bonds and variation in the centre of symmetry of functional groups, giving rise to new peaks or shifts of bands. However, the position of the band maximum and its shape did not change upon adsorption of the peptide from solution over time, which is consistent with the peptide's inability to displace surface-adsorbed water, and thus to interact with the underlying surface.

The amide I band from adsorbed mfp3S-pep-3Dopa on  $\text{TiO}_2$  (Fig. 7b) exhibited a maximum at about 1647  $\text{cm}^{-1}$  along with a broader shoulder at lower wavenumbers consistent with both random and  $\beta$ -sheet secondary structures, respectively. The contribution from  $\beta$ -sheets to the

amide I band became more evident over the course of the adsorption (a peak gradually becoming more intense with time at lower wavenumbers of the amide I band), pointing to a conversion of random structures into  $\beta$ -sheets as the peptide interacted with the titania surface.

Lastly, the coacervated peptide showed well-resolved peaks within the amide I from its adsorption on the same surface (Fig. 5c). The two peaks in the first spectrum can be attributed to the concomitant presence of  $\alpha$ -helix and  $\beta$ -turn (about  $1660\text{ cm}^{-1}$ ) and  $\beta$ -sheet (about  $1625\text{ cm}^{-1}$ ) structures. Over time, the two peaks merged into one band at  $1656\text{ cm}^{-1}$ , which is indicative of  $\alpha$ -helices only.

On the HAP surface, all three ATR-IR adsorption studies (Fig. 10) gave comparable results to those obtained on  $\text{TiO}_2$ . In summary, the shape and evolution of the amide I band in the adsorption experiments confirmed that the peptide without Dopa was not able to effectively interact with the  $\text{TiO}_2$  surface, whilst mfp3S-pep-3Dopa revealed structural rearrangements during the adsorption process both in solution and as a coacervate.
